# Supplementary material
Source: HighWire-hosted journal article supplement (https://www.cmaj.ca/highwire/filestream/58161/field_highwire_adjunct_files/1/delivery-aben--online_appendix_2.pdf)
Supplement: delivery-aben--online_appendix_2.pdf [file delivery-aben--online_appendix_2.pdf]

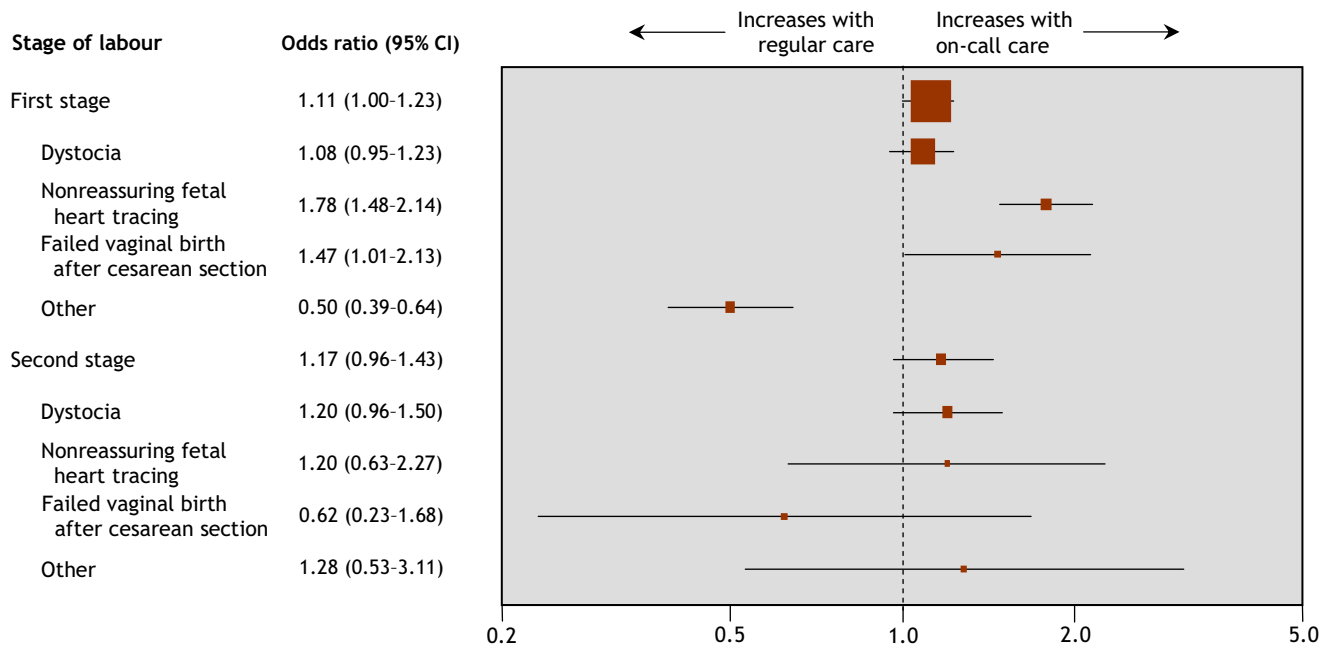

**Appendix 2:** Forest plot showing the odds ratios for cesarean deliveries attended by on-call obstetricians, by stage of labour and indication
